# Supplementary material for: Hemolysis dictates monocyte differentiation via two distinct pathways in sickle cell disease vaso-occlusion
Source: JCI journal article supplement (doi:10.1172/jci172087), 2023-07-25
Supplement: sd1 [file 1]

301 Moved Permanently

# Moved Permanently

The document has moved here.
