# Supplementary material for: Hemolysis dictates monocyte differentiation via two distinct pathways in sickle cell disease vaso-occlusion
Source: JCI journal article supplement (doi:10.1172/jci172087), 2023-07-25
Supplement: sd1 [file 1]

## **Supplemental data**

### **Hemolysis Dictates Monocyte Differentiation via Two Distinct Pathways in Sickle Cell Disease Vaso-occlusion**

Yunfeng Liu, Shan Su, Sarah Shayo, Weili Bao, Mouli Pal, Kai Dou, Patricia A. Shi, Banu Aygun, Sally Campbell-Lee, Cheryl A. Lobo, Avital Mendelson, Xiuli An, Deepa Manwani, Hui Zhong and Karina Yazdanbakhsh

#### **Supplemental List:**

**Table S1**

**Figure S1**

**Figure S2**

**Figure S3**

**Figure S4**

**Table S1 Steady-state SCD patient information**

| Parameters                                                    | Patients with SCD    |
|---------------------------------------------------------------|----------------------|
| Number                                                        | n = 30               |
| Age (years), median (min, max)                                | 22 (14, 61)          |
| Female                                                        | 20 (67%)             |
| Hemoglobin S (%), median (min, max)                           | 72.4 (25.6, 91.1)    |
| Post-splenectomy                                              | 2 (7%)               |
| WBC ( $\times 10^3/\mu\text{l}$ ), median (min, max)          | 9.55 (4.1, 17.3)     |
| Neutrophil ( $\times 10^3/\mu\text{l}$ ), median (min, max)   | 5.28 (2, 12.4)       |
| Lymphocyte ( $\times 10^3/\mu\text{l}$ ), median (min, max)   | 2.73 (1.32, 6.1)     |
| Monocyte ( $\times 10^3/\mu\text{l}$ ), median (min, max)     | 0.60 (0.17, 1.06)    |
| Hemoglobin (g/dl), median (min, max)                          | 9.05 (6.8, 13.3)     |
| Reticulocyte ( $\times 10^3/\mu\text{l}$ ), median (min, max) | 293.8 (137.2, 675.2) |
| Platelet ( $\times 10^3/\mu\text{l}$ ), median (min, max)     | 364 (181, 748)       |

Of the 30 patients: 13 (43%) were on a chronic transfusion protocol alone; 3 (10%) on a combination of hydroxyurea (HU) and chronic transfusion; 11 (37%) patients were on HU alone, 1 (3%) patient on Endari alone, and 2 (6.7%) patients on Voxelator alone; 7(23%) patients had a previous history of alloantibodies.

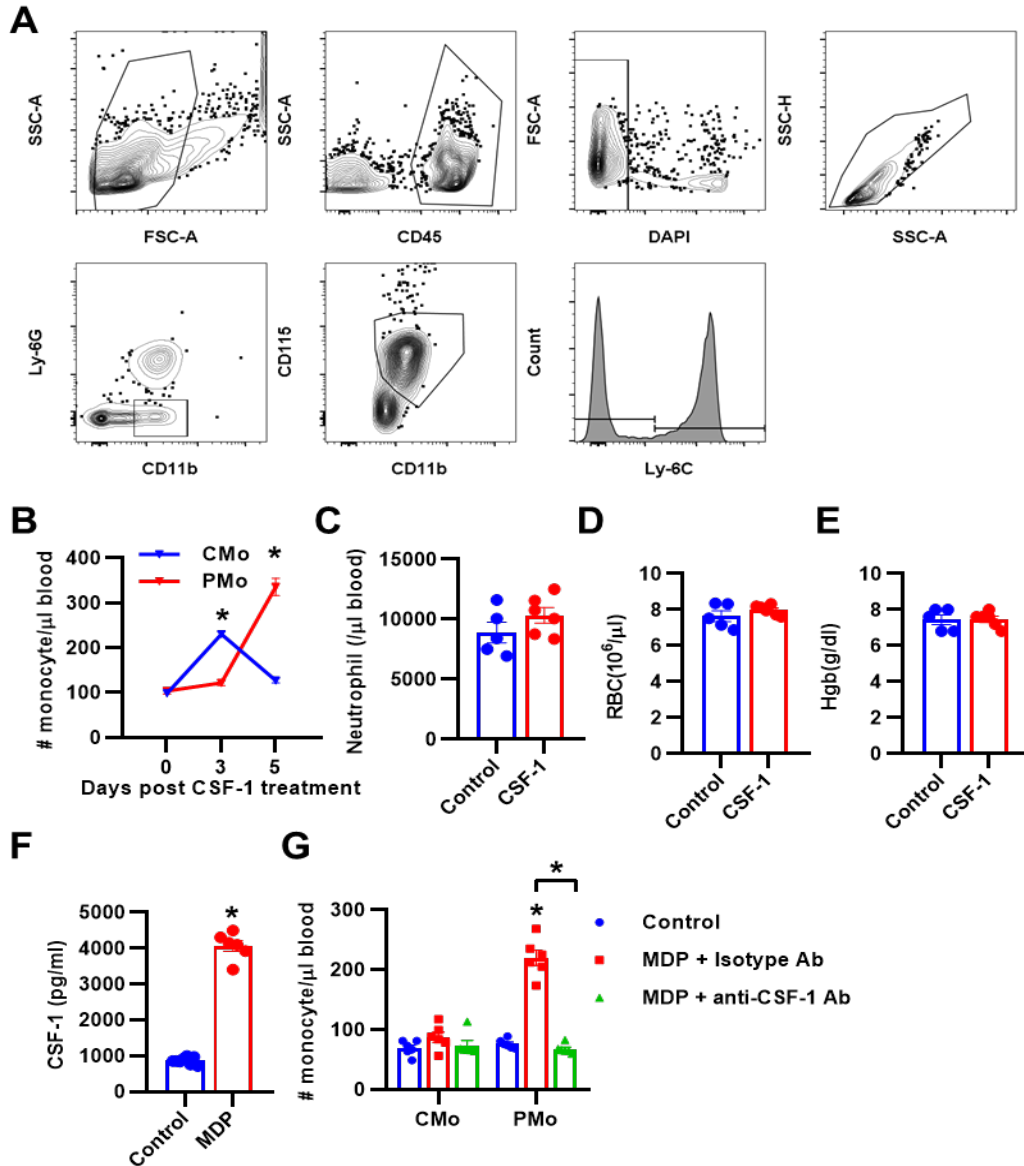

**Figure S1** Monocyte subpopulations in mouse blood and response to CSF-1 and MDP treatments. (A) Gating strategy for mouse blood classical monocytes (CMo, CD11b+CD115+Ly-6C<sup>hi</sup>) and patrolling monocytes (PMo, CD11b+CD115+Ly-6C<sup>lo/-</sup>) in single live CD45+ leukocytes. (B) Absolute number of circulating Ly-6C<sup>hi</sup> CMo and Ly-6C<sup>lo/-</sup> PMo in WT mice (n = 6) at day 3 and 5 post s.c. injection with CSF-1 (0.5 mg/kg body weight/day) or PBS control (200  $\mu$ l/ 20 g body weight/day). (C) Blood neutrophil numbers, (D) Blood RBC numbers, and (E) blood hemoglobin (Hgb) levels in sickle mice at day 5 post s.c. injection with CSF-1 (0.5 mg/kg body weight/day) as in figure 1C (n = 5-6). (F) Plasma CSF-1 levels in WT mice at 20 hours after i.v. injection with MDP (1 mg/kg body weight) or PBS as control (n = 6-8). (G) Absolute number of circulating Ly-6C<sup>hi</sup> CMo and Ly-6C<sup>lo/-</sup> PMo in WT mice at day 5 post treatment with MDP (1 mg/kg body weight/day) and blocking antibody against CSF-1 or isotype control (1 mg/kg body weight/two days) (n = 6). Symbols represent data from individual mice. Data are represented as mean  $\pm$  SEM, and compared using a two-tailed Student's *t*-test in all the Figures except Figure B and G which were compared using two-way ANOVA with Bonferroni's multiple comparisons. \* *p* < 0.05.

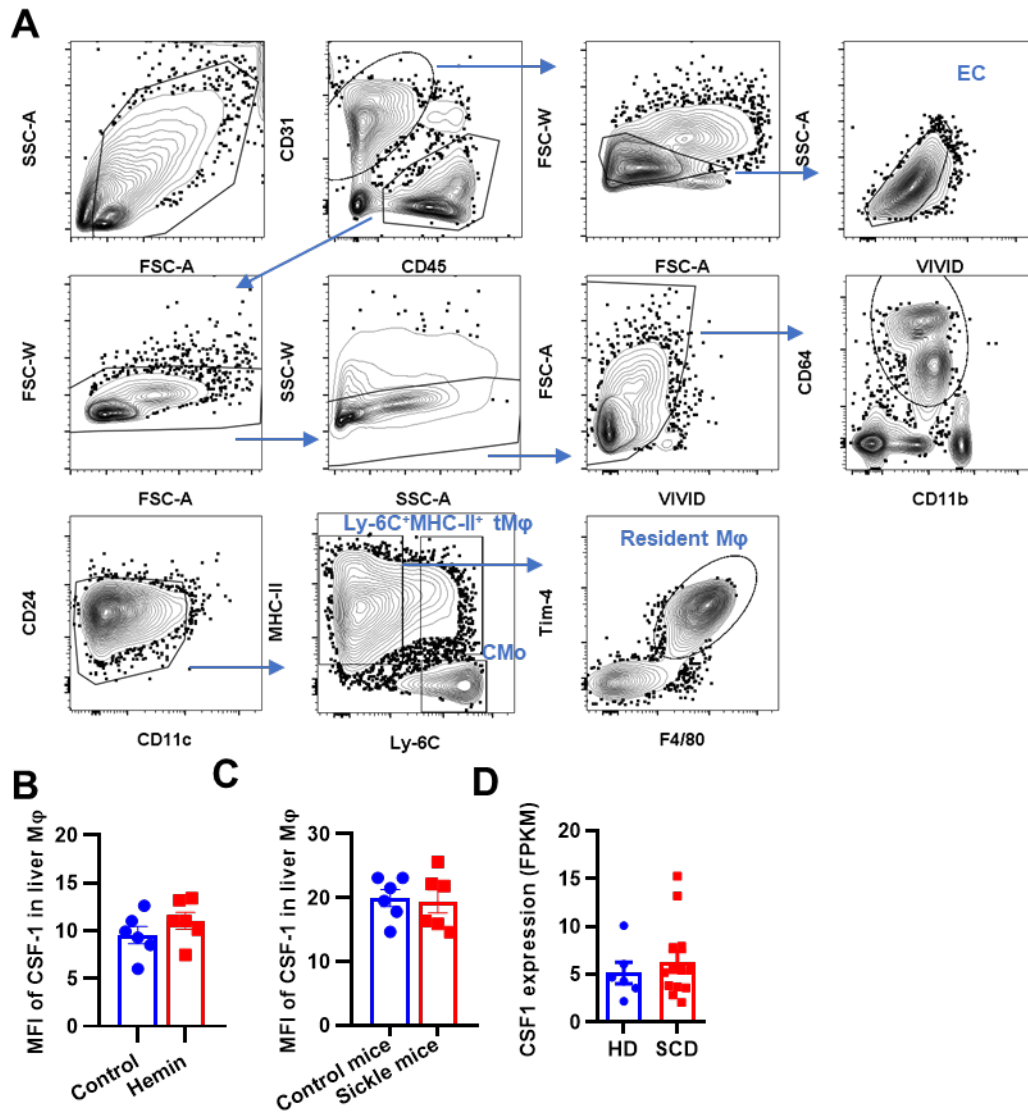

**Figure S2** Mouse liver endothelial cell and leukocyte subpopulation gating strategy and CSF-1 expression. (A) Gating strategy for mouse liver endothelial cells (EC) as single VivID<sup>-</sup>CD45<sup>-</sup>CD31<sup>+</sup> cells, leukocytes as single VivID<sup>-</sup>CD45<sup>+</sup> cells, and leukocyte subsets including resident Mφ as F4/80<sup>hi</sup>CD11b<sup>lo</sup>CD64<sup>+</sup>Tim-4<sup>+</sup> CD11c<sup>lo/-</sup>CD24<sup>lo/-</sup> leukocytes, CMo as Ly-6C<sup>hi</sup>MHC-II<sup>-</sup>CD11b<sup>lo</sup>CD64<sup>+</sup>CD11c<sup>lo/-</sup>CD24<sup>lo/-</sup> leukocytes, and Ly-6C<sup>hi</sup>MHC-II<sup>+</sup> transient macrophage (tMφ) as Ly-6C<sup>hi</sup>MHC-II<sup>+</sup>CD11b<sup>lo</sup>CD64<sup>+</sup>CD11c<sup>lo/-</sup>CD24<sup>lo/-</sup> leukocytes. (B) scatter plot with bar showing CSF-1 expression in liver resident Mφ from WT mice at 20 hours post treatment with PBS as control (200 μl/ 20 g body weight) or hemin (35 μmol/kg body weight) (n = 6). (C) scatter plot with bar showing CSF-1 expression in liver resident Mφ from sickle mice or control mice (n = 6). (D) CSF-1 expression in human CMo from SCD patients (n=13) and HD (n=6) (GSE149050, as in our published report<sup>3</sup>). Symbols represent data from individual mice. Data are represented as mean ± SEM, and compared using a two-tailed Student's *t*-test. \* *p* < 0.05.

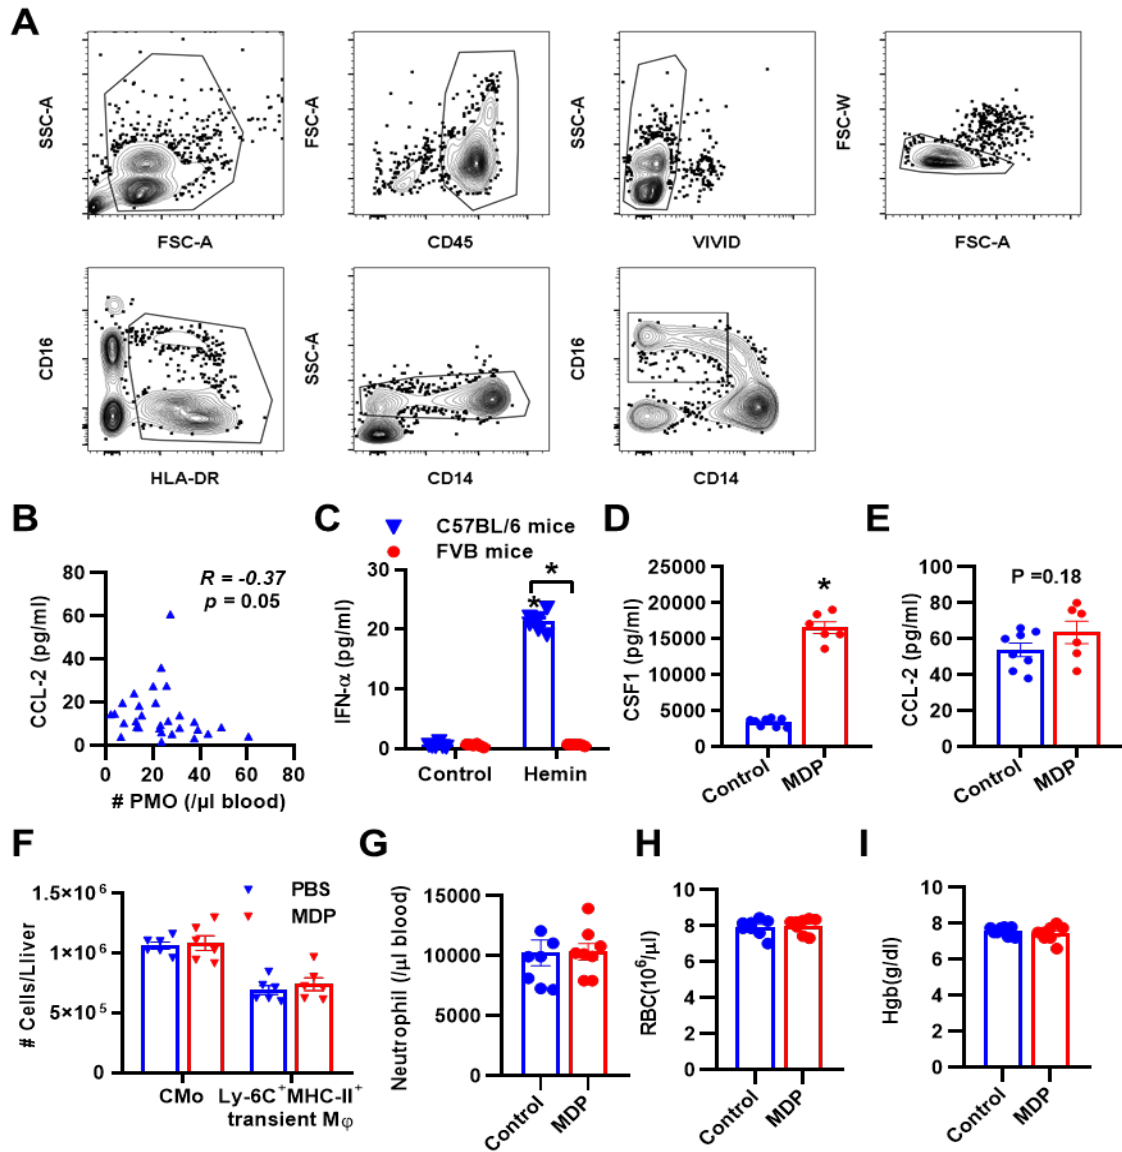

**Figure S3** Correlation between plasma CCL-2 levels and circulating PMo numbers, and response to hemin and MDP treatments. (A) Gating strategy for human blood patrolling monocytes (PMo, HLA-DR<sup>+</sup>SSC<sup>lo</sup>CD14<sup>lo/-</sup>CD16<sup>+</sup>) in single live CD45<sup>+</sup> PBMCs. (B) Scatter plot analysis showing correlation relationship between plasma CCL-2 levels and absolute numbers of circulating PMo in patients with SCD (n = 30 as in Fig. 1). (C) Plasma IFN- $\alpha$  levels in WT C57BL/6 mice and FVB mice 20 hours after i.v. injection with hemin (35  $\mu$ mol/kg body weight), or PBS (200  $\mu$ l/ 20 g body weight) as control (n = 6). Plasma CSF-1 levels (D) and CCL-2 levels (E) in sickle mice (n = 6-8) one day after treatment with MDP (1 mg/kg body weight) or PBS control. (F) Absolute number of liver Ly-6C<sup>hi</sup>MHC-II<sup>-</sup> CMo and Ly-6C<sup>+</sup>MHC-II<sup>+</sup> transient macrophage (M $\phi$ ) in sickle mice treated with MDP or PBS (n = 6) as shown in D. (G) Blood neutrophil numbers, (H) Blood RBC numbers, and (I) blood hemoglobin (Hgb) levels in sickle mice treated with MDP as shown in D (n = 8). The correlation analysis in (B) was determined by Spearman Rho. Symbols represent data from individual mice. Symbols represent data from individual mice. Data are represented as mean  $\pm$  SEM, and compared using a two-tailed Student's *t*-test in all the Figures except Figure C and F which were compared using two-way ANOVA with Bonferroni's multiple comparisons.. \*  $p < 0.05$ .

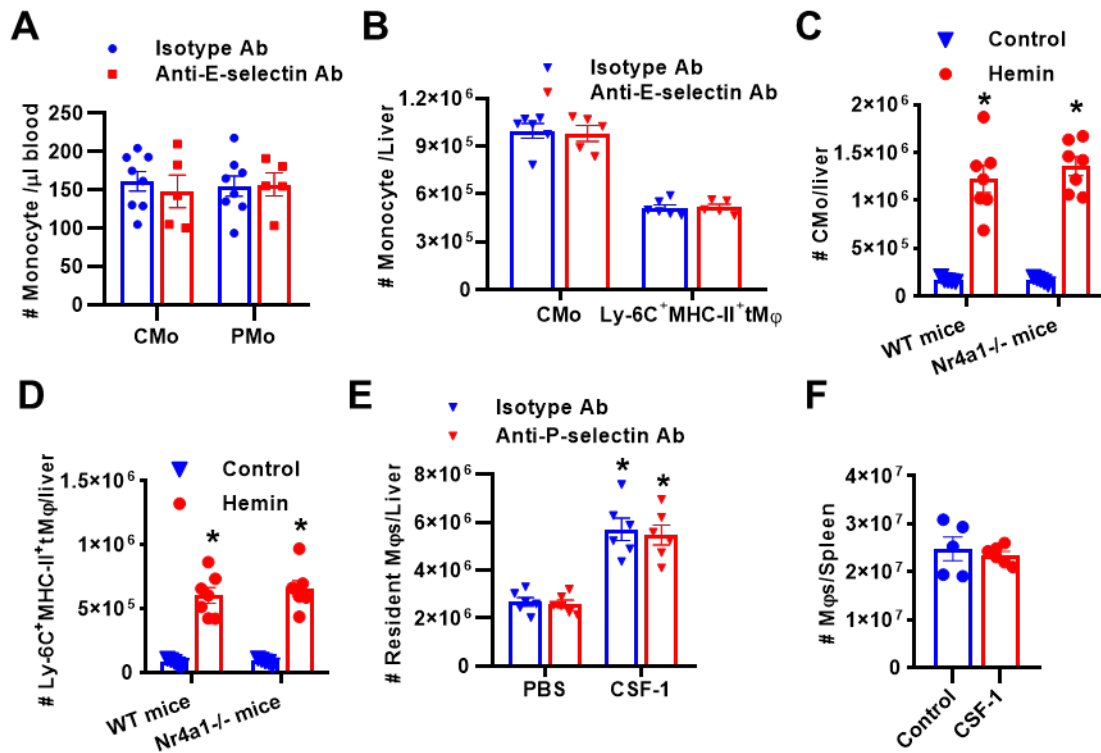

**Figure S4** Response to hemin, CSF-1 and blocking antibodies treatments in mice. (A) Bar graph showing absolute number of circulating Ly-6C<sup>hi</sup> CMO and Ly-6C<sup>lo/-</sup> PMo at 20 hours in hemin (35 μmol/kg body weight)-injected WT mice pretreated for 30 minutes with anti-E-selectin blocking antibody (5 mg/kg body weight, i.v.), or isotype control antibody (5 mg/kg body weight, i.v) (n = 5-8). (B) Bar graph showing absolute number of liver Ly-6C<sup>hi</sup>MHC-II<sup>-</sup> CMO and Ly-6C<sup>+</sup>MHC-II<sup>+</sup> transient macrophage (tMφ) in mice treatment as in A (n = 5-6). Absolute number of liver Ly-6C<sup>hi</sup>MHC-II<sup>-</sup> CMO (C) and Ly-6C<sup>+</sup>MHC-II<sup>+</sup> transient macrophage (tMφ) (D) in WT mice and Nr4a1<sup>-/-</sup> mice 20 hours after i.v. injection with hemin (35 μmol/kg body weight), or PBS (200 μl/ 20 g body weight) as control (n = 5-7). (E) Bar plot showing absolute number of liver resident macrophage (Mφ) in sickle mice at day 5 post anti-P-selectin blocking antibody or isotype control antibody (5 mg/kg body weight, i.p. every other day), with or without s.c. injection with CSF-1 (0.5 mg/kg body weight/day) as shown in Fig. 5 (n = 6). (F) Bar plot showing absolute number of spleen macrophage (Mφ) in sickle mice at day 5 post s.c. injection with CSF-1 (0.5 mg/kg body weight/day) or PBS as control (n = 5-6). Symbols represent data from individual mice. Data are represented as mean ± SEM, and compared using two-way ANOVA with Bonferroni's multiple comparisons in Figure A-E, and using a two-tailed Student's *t*-test in Figure F. \* *p* < 0.05.
